# Supplementary material for: Irradiation of pediatric glioblastoma cells promotes radioresistance and enhances glioma malignancy via genome-wide transcriptome changes
Source: PubMed Central journal article supplement (PMC6183347; doi:10.18632/oncotarget.26137), 2018-09-25
Supplement: oncotarget-09-34122-s001.pdf [file oncotarget-09-34122-s001.pdf]

## **Irradiation of pediatric glioblastoma cells promotes radioresistance and enhances glioma malignancy *via* genome-wide transcriptome changes**

### **SUPPLEMENTARY MATERIALS**

**Supplementary Table 1: Raw data of all differentially expressed genes are shown.**  $P < 0.05$  and experiments were performed in triplicate. See Supplementary\_Table\_1

**Supplementary Table 2: Upregulated genes with 2-fold or higher changes are shown.**  $P < 0.05$  and experiments were performed in triplicate. See Supplementary\_Table\_2

**Supplementary Table 3: Downregulated genes with 2-fold or higher changes are shown.**  $P < 0.05$  and experiments were performed in triplicate. See Supplementary\_Table\_3

**Supplementary Table 4: Upregulated genes of selected enriched gene ontology categories following irradiation are shown based on sets of statistically significant changes (>2-fold changes,  $P < 0.05$ ).** See Supplementary\_Table\_4
